# Supplementary material
Source: PubMed Central journal article supplement (PMC4473773)

## Supplementary Appendix

This appendix has been provided by the authors to give readers additional information about their work.

Supplement to: Douglas PS, Hoffmann U, Patel MR, et al. Outcomes of anatomical versus functional testing for coronary artery disease. *N Engl J Med* 2015;372:1291-300. DOI: 10.1056/NEJMoa1415516

## Supplementary Appendix

|                                                                                                                                                                   |         |
|-------------------------------------------------------------------------------------------------------------------------------------------------------------------|---------|
| Trial Organization                                                                                                                                                | page 2  |
| Enrolling Investigators and Sites                                                                                                                                 | page 4  |
| Supplemental Figure S1. Kaplan-Meier Estimates of the Composite Primary End Point and Selected Secondary End Points as a Function of Time Following Randomization | page 9  |
| Supplemental Figure S2. Effects of a CTA Strategy on the Primary End Point, According to Baseline Characteristics                                                 | page 11 |
| Supplemental Figure S3. Cumulative Radiation Exposure at 90 Days after Randomization                                                                              | page 13 |
| Supplemental Table S1. Trial Inclusion and Exclusion Criteria                                                                                                     | page 14 |
| Supplemental Table S2. Definitions of the Components of the Primary End Point                                                                                     | page 15 |
| Supplemental Table S3. Definitions of Positive Results from Diagnostic Tests                                                                                      | page 16 |
| Supplemental Table S4. Outcomes According to Study Group at 12 Months                                                                                             | page 19 |
| Supplemental Table S5. Diagnostic Test Adverse Events and Serious Adverse Events by Testing Modality                                                              | page 20 |
| Patient and Provider Educational Materials                                                                                                                        | page 21 |

## **Trial Organization**

### **Executive Committee**

Pamela S. Douglas, MD, Duke Clinical Research Institute, Durham, NC  
Lawton Cooper, MD, National Heart, Lung, and Blood Institute, Bethesda, MD  
Udo Hoffmann, MD, MPH, Massachusetts General Hospital, Boston, MA  
Kerry Lee, PhD, Duke Clinical Research Institute, Durham, NC  
Daniel Mark, MD, MPH, Duke Clinical Research Institute, Durham, NC

### **Data and Safety Monitoring Board**

Robert Bonow, MD, Northwestern University Feinberg School of Medicine, Chicago, IL  
Garnet Anderson, PhD, Fred Hutchinson Cancer Research Center, Seattle, WA  
Alain Berton, MD, MPH, Wake Forest University School of Medicine, Winston-Salem, NC  
J. Jeffrey Carr, MD, Wake Forest University School of Medicine, Winston-Salem, NC  
James K. Min, MD, New York-Presbyterian Hospital/Weill-Cornell Medical Center, New York, NY  
Michael Proschan, PhD, National Institutes of Health, Bethesda, MD  
John A. Spertus, MD, MPH, Washington University School of Medicine, St. Louis, MO  
Connie M. Ulrich, PhD, RN, University of Pennsylvania School of Nursing, Philadelphia, PA

### **Operations Steering Committee (in addition to Executive Committee)**

Hussein R. Al-Khalidi, PhD, Duke Clinical Research Institute, Durham, NC  
Denise Bonds, MD, MPH, National Heart, Lung, and Blood Institute, Bethesda, MD  
Nakela Cook, MD, National Heart, Lung, and Blood Institute, Bethesda, MD  
Rowena J. Dolor, MD, MHS, Duke Clinical Research Institute, Durham, NC  
Alan Go, MD, Kaiser Permanente Division of Research, Oakland, CA  
Christopher Fordyce, MD, Duke Clinical Research Institute, Durham, NC  
Tina Harding, RN, BSN, Duke Clinical Research Institute, Durham, NC  
Sarah Hayden, Duke Clinical Research Institute, Durham, NC  
Andrzej Kosinski, PhD, Duke Clinical Research Institute, Durham, NC  
Mitchell W. Krucoff, MD, Duke Clinical Research Institute, Durham, NC  
Eric Leifer, PhD, National Heart, Lung, and Blood Institute, Bethesda, MD  
Beth Martinez, Duke Clinical Research Institute, Durham, NC  
Daniel W. Mudrick, MD, MPH, Duke Clinical Research Institute, Durham, NC  
Manesh R. Patel, MD, Duke Clinical Research Institute, Durham, NC  
Michael H. Picard, MD, Massachusetts General Hospital, Boston, MA  
Geoffrey Rubin, MD, Duke University School of Medicine, Durham, NC  
Kristen Salvaggio, Massachusetts General Hospital, Boston, MA  
Ricky M. Schneider, MD, Holy Cross Hospital, Fort Lauderdale, FL  
Alexandra Shen, MD, Duke Clinical Research Institute, Durham, NC  
Jean Claude Tardif, MD, Montréal Heart Institute, Montreal, Canada  
Wanda Tate, Duke Clinical Research Institute, Durham, NC  
James E. Udelson, MD, Tufts University School of Medicine, Boston, MA  
John Vavalle, MD, Duke Clinical Research Institute, Durham, NC  
Eric J. Velazquez, MD, Duke Clinical Research Institute, Durham, NC

### **Statistical and Data Coordinating Center**

Kerry Lee, PhD, Duke Clinical Research Institute, Durham, NC  
Hussein R. Al-Khalidi, PhD, Duke Clinical Research Institute, Durham, NC

Andrzej Kosinski, PhD, Duke Clinical Research Institute, Durham, NC  
Jyotsna Garg  
Megan Huang, PhD  
Stephanie Wu  
Qinghong Yang  
Eric Yow, MS  
Aijing (Zoe) Zhang

**Diagnostic Testing Coordinating Center**

Udo Hoffmann, MD, MPH, Massachusetts General Hospital, Boston, MA  
Charles Apgar, MBA, American College of Radiology, Philadelphia, PA  
Kristen Salvaggio, Massachusetts General Hospital, Boston, MA  
James E. Udelson, MD, Tufts University School of Medicine, Boston, MA

**Core Laboratories**

CTA: Udo Hoffmann, MD, MPH (PI), Massachusetts General Hospital, Boston, MA  
Stephan Achenbach, MD (overreads), University of Erlangen, Germany  
Erin Corsini, Massachusetts General Hospital, Boston, MA  
Brian B. Ghoshhajra, MD, MBA (sites, radiation), Massachusetts General Hospital, Boston, MA  
Michael Lu, MD, Massachusetts General Hospital, Boston, MA  
Quynh Truong, MD, MPH (online reader certification), Massachusetts General Hospital, Boston, MA

Nuclear imaging: James E. Udelson, MD, Tufts University School of Medicine, Boston, MA  
Debra Kinan, RT(N), Tufts University School of Medicine, Boston, MA

Stress echocardiography: Michael H. Picard, MD, Massachusetts General Hospital, Boston, MA

Stress ECG: Mitchell W. Krucoff, MD, Duke Clinical Research Institute, Durham, NC  
Coronary angiography: Manesh Patel, MD, Duke Clinical Research Institute, Durham, NC

## **Enrolling Investigators and Sites**

### **UNITED STATES**

#### **Alabama**

Edward Carlos, Sunbelt Research Group LLC; Jason Cole, Cardiology Associates; Michael Johnson, North Huntsville Family Care PC; Mathew Krista, PrimeCare; Michael Ridner, The Heart Center PC

#### **Arizona**

Aiden Abidov, University Medical Center; Barbara Barker, Advanced Cardiac Specialists; Roger Bies, Mercy Gilbert Medical Center

#### **Arkansas**

David Jones, Arkansas Cardiology PA; Larry Weathers, Mercy Heart and Vascular Center

#### **California**

Timothy Albert, Salinas Valley Memorial Hospital; Kevin Ariani, Northridge Hospital Medical Center; Supratim Banerjee, Comprehensive Cardiovascular Medical Group; Matthew Budoff, Los Angeles Biomedical Research Institute; Donald Chang, V.A. Greater Los Angeles Healthcare System; Steven Forman, Los Alamitos Cardiovascular; Gary Foster, V.A. Loma Linda Healthcare System; Joe Hsu, Kaiser Permanente Medical Center; James Jang, Kaiser Permanente; Andrew Kahn, University of California San Diego Medical Center; Ronald Karlsberg, Cardiovascular Research Foundation of Southern California; Mayil Krishnam, University of California Irvine Medical Center; Margaret Lee, Olive View - UCLA Medical Center; Norman Lopor, Westside Medical Associates of Los Angeles; Irving Loh, Westlake Medical Research; Mark Lurie, Torrance Memorial Medical Center; Michael McConnell, Stanford University Medical Center; Stefan Ruehm, Ronald Reagan UCLA Medical Center; Gabriel Vorobiof, Long Beach Memorial Hospital

#### **Colorado**

Simeon Abramson, Porter Adventist Hospital; Steven Friedrich, South Denver Cardiology Associates PC; Jamaluddin Moloo, University of Colorado Hospital; Stephen Treat, Medical Center of the Rockies

#### **Connecticut**

Andrew Keller, Danbury Hospital; Clifford Yang, University of Connecticut Health Center

#### **Florida**

Dean Bramlet, Dean Bramlet MD PA; Edward Braun, Midtown Medical Center; Jean Foucauld, Cardiology Partners Research Institute; Akash Ghai, Tallahassee Research Institute; Pablo Guzman, Cardiology Associates of Fort Lauderdale; Robert Hendel, University of Miami Hospital; Julian Javier, Pharma Research International Inc.; Carsten Schmalfuss, Malcom Randall V.A. Medical Center; Ricky Schneider, Holy Cross Medical Group; Carlos Sotolongo, Baptist Heart Specialists; Alan Tannenbaum, Primary Care Associates; Barry Weinstock, Orlando Regional Medical Center

## **Georgia**

Kimberly Champney, Northside Hospital; Stephen Frohwein, Saint Josephs Hospital of Atlanta; Lonnie Jenkins, Synergy Therapeutic Partners; Devendra Koganti, Southern Heart Research Institute LLC; Sheldon Litwin, Georgia Regents University; Patricia Shapiro, South Coast Medical Group

## **Hawaii**

Cyril Leung, Kaiser Permanente Moanalua Medical Center

## **Idaho**

David Hinchman, Saint Lukes Boise Medical Center

## **Illinois**

Stanley Clark, Midwest Heart Foundation; Sorin Danciu, Advocate Medical Group - Heart and Vascular of Illinois; Jerome Hines, Illinois Heart and Vascular Foundation; Amit Patel, University of Chicago Medical Center; Daniel Sullivan, Midwest Heart Foundation; Dinker Trivedi, Advocate Christ Medical Center; Mladen Vidovich, University of Illinois at Chicago

## **Indiana**

Jo Mahenthiran, Indiana Heart Hospital; Saeed Shaikh, Indiana Heart Physicians Inc.; Shawn Teague, Indiana University Health

## **Iowa**

Craig Clark, Radiology Consultants of Iowa; Enrico Martin, Iowa Heart Center; Gardar Sigurdsson, University of Iowa Hospitals and Clinics

## **Kansas**

Steve Bloom, Midwest Cardiology Associates; Michael Hagley, Promise Regional Medical Center

## **Kentucky**

William Schmidt II, Norton Cardiovascular Associates; Vincent Sorrell, University of Kentucky Hospital

## **Louisiana**

Michael Turner, Cardiovascular Specialist of Southwest Louisiana

## **Maine**

Robert Weiss, Maine Research Associates

## **Maryland**

Steven Hearne, Delmarva Heart LLC; Scott Jerome, University of Maryland Cardiology Physicians

**Massachusetts**

Alexander Morss, South Shore Hospital; Rick Ruberg, Boston Medical Center; Quynh Truong, Massachusetts General Hospital

**Michigan**

Khaled Abdul-Nour, Henry Ford Health System; Kavitha Chinnaiyan, William Beaumont Hospital; Tauqir Goraya, Michigan Heart PC; John Heath, William Beaumont Hospital - Troy; Mark Meengs, Mercy Health Muskegon; George Nahhas, Oakwood Hospital and Medical Center - Dearborn; Majed Nounou, Cardiology Consultants of East Michigan; Souheil Saba, Saint John Providence Park Hospital; Susan Sallach, Michigan Cardiovascular Institute

**Minnesota**

Wilson Ginete, Essentia Health Saint Marys Medical Center; Gregory Helmer, University of Minnesota Heart Care; Mary McLaurin, North Memorial Medical Center; Patricia Pellikka, Mayo Clinic; Jamie Pelzel, CentraCare Heart and Vascular Center at Saint Cloud Hospital

**Mississippi**

William Carroll, Cardiology Associates of North Mississippi; Arthur Martin, Hattiesburg Clinic; Andrew Rivard, University of Mississippi Medical Center

**Missouri**

Jeffrey Ciaramita, Saint Johns Mercy Heart Hospital; Zafir Hawa, North Kansas City Hospital; Pamela Woodard, Barnes Jewish Hospital

**Montana**

Alexander Jehle, Saint Patrick Hospital and Health Sciences Center

**Nebraska**

Michael Delcore, The Cardiac Center of Creighton University; Thomas Porter, University of Nebraska Medical Center; Eric Van De Graaff, Alegent Midlands Community Hospital

**New Jersey**

Navin Budhwani, The Valley Hospital; Renee Bullock-Palmer, Deborah Heart and Lung Center; Andrey Espinoza, Hunterdon Medical Center; John Kostis, University of Medicine and Dentistry of New Jersey/Robert Wood Johnson Medical School; Muhammad Mustafa, Capital Cardiology Associates

**New Mexico**

Brendan Cavanaugh, New Mexico Heart Institute PA

**New York**

Randy Cohen, Saint Lukes Roosevelt Hospital Center; Robert Donnino, V.A. New York Harbor Healthcare System - Manhattan Campus; Mario Garcia, Montefiore Medical Center; Dennis Goodman, New York Medical Associates; John Heitner, New York Methodist Hospital; Mazullah Kamran, Elmhurst Hospital;

Ellis Lader, MidValley Cardiology; Michael Marmulstein, Albany Associates in Cardiology; Dhananjai Menzies, Bassett Medical Center; Robert Morris, Capital Cardiology Associates; Brian Page, University at Buffalo; Chong Park, New York Hospital of Queens; Michael Poon, Stony Brook University Medical Center; Michael Wilson, Millard Fillmore Suburban Hospital

### **North Carolina**

Mahmoud Atieh, Sanford Cardiology; David Bohle, Forsyth Medical Center; Rowena Dolor, Primary Care Research Consortium at Duke Clinical Research Institute; Michael Dulin, Carolinas Medical Center Eastland Family Practice; Christian Gring, Wake Heart and Vascular Associates; Joseph Hakas, Pinehurst Medical Clinic Inc.; Dalton McLean, Lebauer Cardiovascular Research Foundation; Mark Rorie, Asheville Cardiology Associates; Kevin Sharkey, Novant Health Heart and Vascular Institute

### **North Dakota**

Yassar Almanaseer, Essentia Health

### **Ohio**

William Dirkes, Sentral Clinical Research Services; Jonathan Goldberg, Louis Stokes Cleveland VA Medical Center; Mark Iler, Summa Health System; Karen Kutoloski, Metro Health System; Mohammed Maaieh, Northwest Ohio Cardiology Consultants; John Mashny, Bethesda North Hospital; Robert Pelberg, Lindner Clinical Trial Center; David Richards, Riverside Methodist Hospital; Jodi Tinkel, The University of Toledo

### **Oklahoma**

George Chrysant, Integris Baptist Medical Center; Roger Des Prez, Oklahoma Heart Institute; Gregory Hill, Warren Cancer Research Foundation/Saint Francis Hospital; Iftikhar Hussain, Vital Prospects Clinical Research Institute PC

### **Oregon**

Michael Shapiro, Oregon Health and Science University

### **Pennsylvania**

Christopher Allen, Donahue Cardiology Associates; Zaruhi Babayan, The Guthrie Clinic; Terry Bauch, Geisinger Medical Center; Jennifer Berliner, V.A. Pittsburgh Healthcare System; Alfred Bove, Temple University Hospital; Donald Fox, Eastwick Primary Care PC; Ron Jacob, Lancaster Heart and Stroke Foundation; Carlos Jamis-Dow, Penn State Milton S Hershey Medical Center; Venkatesh Nadar, Capital Area Research LLC; Thomas Phiambolis, Lankenau Medical Center

### **South Carolina**

David Gregg, Medical University of South Carolina; David Isbell, Columbia Heart; Steven Johnson, Upstate Cardiology PA; Priya Kumar, Piedmont Cardiology Associates

### **Tennessee**

Shobha Hiremagalur, Blue Ridge Medical Management Corporation; David Huneycutt Jr, Centennial Heart Cardiovascular Consultants; Elie Korban, Kore Cardiovascular Research; Harry Severance, Erlanger Medical Center



## **Texas**

Subhash Banerjee, V.A. North Texas Health Care System; Gurpreet Baweja, Texas Health Research and Education Institute; John Erwin III, Scott and White Memorial Hospital; Osvaldo Gigliotti, Seton Medical Center; Muhammad Khan, North Dallas Research Associates; Ira Lieber, Texas Cardiology Associates of Houston; Frank Navetta, Tyler Cardiovascular Consultants PA; John Osborne, State of the Heart Cardiology; Ahmad Slim, Brooke Army Medical Center; Richard Wilks, BHS Specialty Network Inc.

## **Virginia**

Anu George, Seven Corners Medical Center; Aaron Hartman, Virginia Research Center LLC; Robert Levitt, National Clinical Research Inc.; Charles Phillips, Virginia Cardiovascular Specialists; Michael Salerno, University of Virginia Health System; Brian Schietinger, Centra Health Cardiovascular Group; Jack Slowikowski, Carilion Clinic Cardiac Research

## **Washington**

Vinay Malhotra, Cardiac Study Center; L. Douglas Waggoner, Kootenai Heart Clinics LLC

## **West Virginia**

William Carter, Charleston Area Medical Center

## **Wisconsin**

Joshua Liberman, Wisconsin Cardiovascular Group; Timothy Logemann, Aspirus Heart and Vascular Institute; John Manley, Wheaton Franciscan Healthcare/The Wisconsin Heart Hospital; Steve Port, Aurora Cardiovascular Services; Mary Zasadil, University of Wisconsin Madison

## **CANADA**

### **Ontario**

Benjamin Chow, University of Ottawa Heart Institute

### **Quebec**

Eric Larose, Institute de Cardiologie et de Pneumologie de Quebec; Jean-Claude Tardif, Montreal Heart Institute

**Supplemental Figure S1. Kaplan-Meier Estimates of the Composite Primary End Point and Selected Secondary End Points as a Function of Time Following Randomization**

Panel A shows unadjusted Kaplan-Meier rates of the primary end point (all cause death, nonfatal myocardial infarction [MI], hospitalization for unstable angina, or major procedural complications). The adjusted hazard ratio (HR) for a CTA strategy, as compared with a usual care functional testing strategy, was 1.04 (95% CI, 0.83–1.29) (adjusted for age, sex, CAD risk equivalent [history of either diabetes, peripheral arterial disease, or cerebrovascular disease], and the pre-specification of the intended functional test if randomized to the functional testing arm). The inset graph shows the data with expanded x and y axes to highlight events occurring within 12 months of randomization; the adjusted HR based on 12-month follow-up was 0.94 (95% CI, 0.70–1.26; P=0.682).

Panel B shows unadjusted Kaplan-Meier rates of the time to primary end point plus catheterization without obstructive CAD. The adjusted HR for a CTA strategy, as compared with a usual care functional testing strategy, was 0.91; 95% CI, 0.78–1.06 (adjusted for age, sex, CAD risk equivalent [history of either diabetes, peripheral arterial disease, or cerebrovascular disease], and the pre-specification of the intended functional test if randomized to the functional testing arm). The inset graph shows the data with expanded x and y axes to highlight events occurring within 12 months of randomization; the adjusted HR based on 12-month follow-up was 0.85 (95% CI, 0.72–1.00; P=0.055).

Panel C shows unadjusted Kaplan-Meier rates of the time to death or nonfatal MI. The adjusted HR for a CTA strategy, as compared with a usual care functional testing strategy, was 0.88 (95% CI, 0.67–1.15) (adjusted for age, sex, CAD risk equivalent [history of either diabetes, peripheral arterial disease, or cerebrovascular disease], and the pre-specification of the intended functional test if randomized to the functional testing arm). The inset graph shows the data with expanded x and y axes to highlight events occurring within 12 months of randomization; the adjusted HR based on 12-month follow-up was 0.66 (95% CI, 0.44–1.00; P=0.049).

**A.**

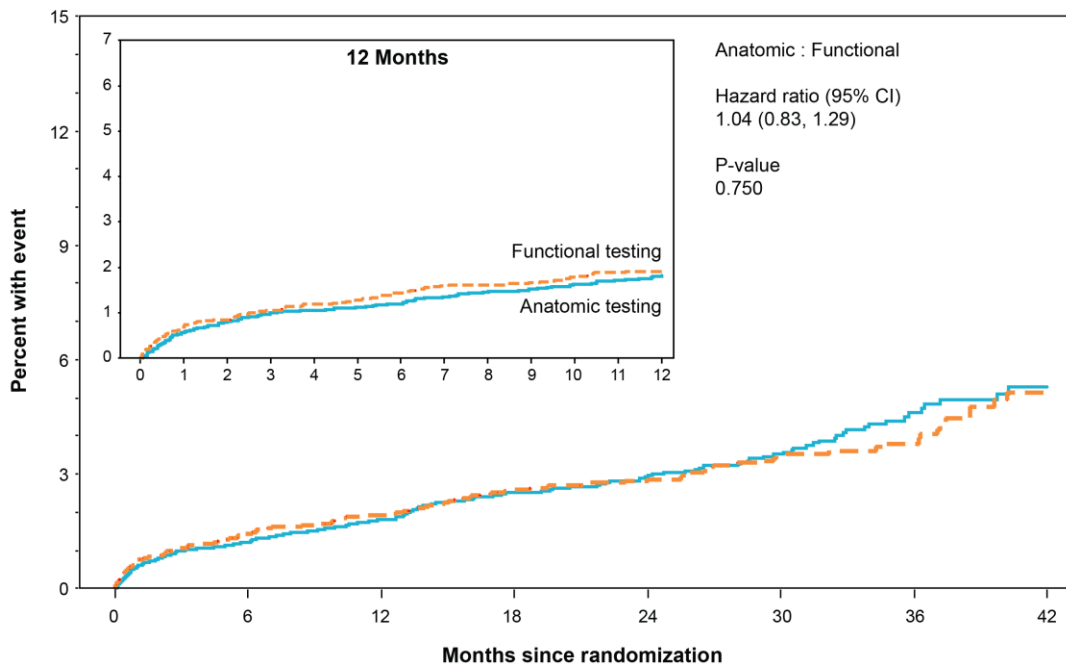

| # at risk          | Baseline (0) | 6 Mo. | 12 Mo. | 18 Mo. | 24 Mo. | 30 Mo. | 36 Mo. | 42 Mo. |
|--------------------|--------------|-------|--------|--------|--------|--------|--------|--------|
| Anatomic testing   | 4996         | 4703  | 4362   | 3551   | 2652   | 1705   | 902    | 269    |
| Functional testing | 5007         | 4536  | 4115   | 3331   | 2388   | 1518   | 832    | 258    |

**B.**

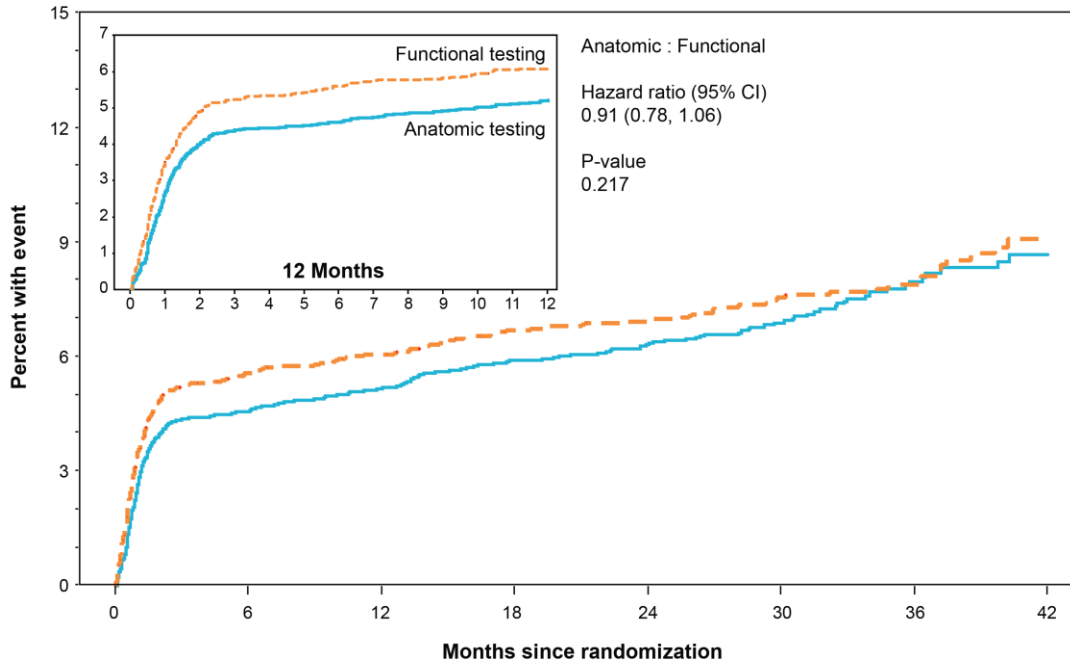

| # at risk          | Baseline (0) | 6 Mo. | 12 Mo. | 18 Mo. | 24 Mo. | 30 Mo. | 36 Mo. | 42 Mo. |
|--------------------|--------------|-------|--------|--------|--------|--------|--------|--------|
| Anatomic testing   | 4996         | 4540  | 4211   | 3430   | 2565   | 1645   | 868    | 255    |
| Functional testing | 5007         | 4341  | 3934   | 3179   | 2276   | 1438   | 781    | 244    |

**C.**

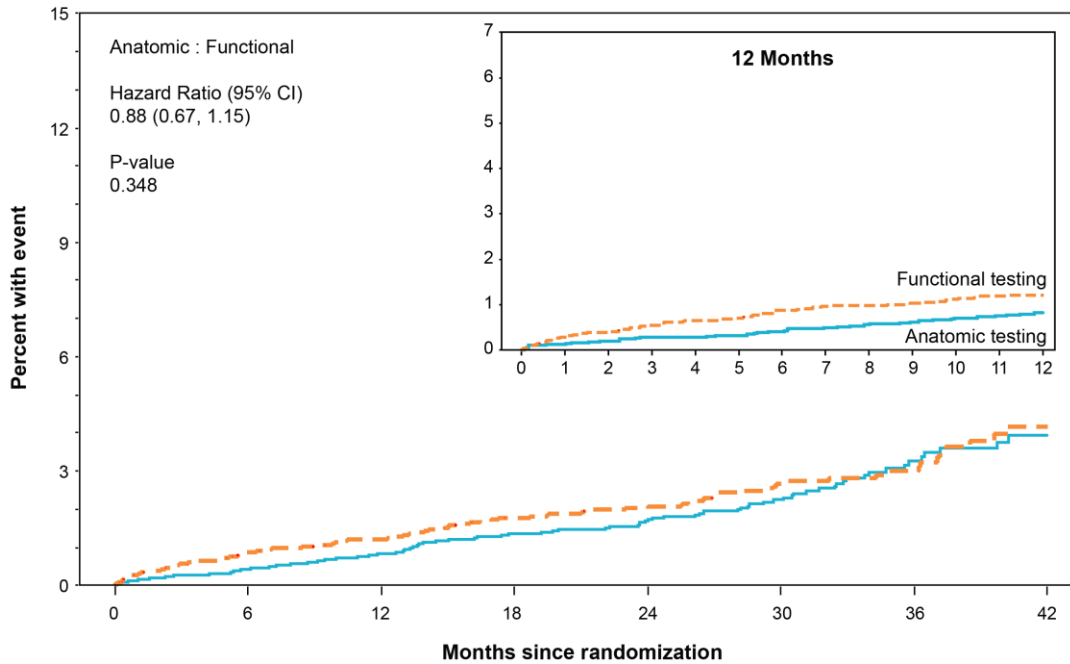

| # at risk          | Baseline (0) | 6 Mo. | 12 Mo. | 18 Mo. | 24 Mo. | 30 Mo. | 36 Mo. | 42 Mo. |
|--------------------|--------------|-------|--------|--------|--------|--------|--------|--------|
| Anatomic testing   | 4996         | 4739  | 4409   | 3599   | 2686   | 1732   | 918    | 276    |
| Functional testing | 5007         | 4563  | 4148   | 3365   | 2415   | 1540   | 846    | 262    |

## Supplemental Figure S2. Effects of a CTA Strategy on the Primary End Point, According to Baseline Characteristics

Panel A shows the effects of a CTA strategy on the primary end point, according to baseline characteristics. The primary end point was the combination of all cause death, nonfatal MI, hospitalization for unstable angina, or major procedural complications. Unadjusted HRs for the CTA strategy as compared with a usual functional testing strategy are shown; the horizontal lines indicate 95% confidence intervals.

Panel B shows the effects of a CTA strategy on the primary end point plus catheterization without obstructive CAD. Unadjusted HRs for the CTA strategy as compared with a usual functional testing strategy are shown; the horizontal lines indicate 95% confidence intervals.

### A.

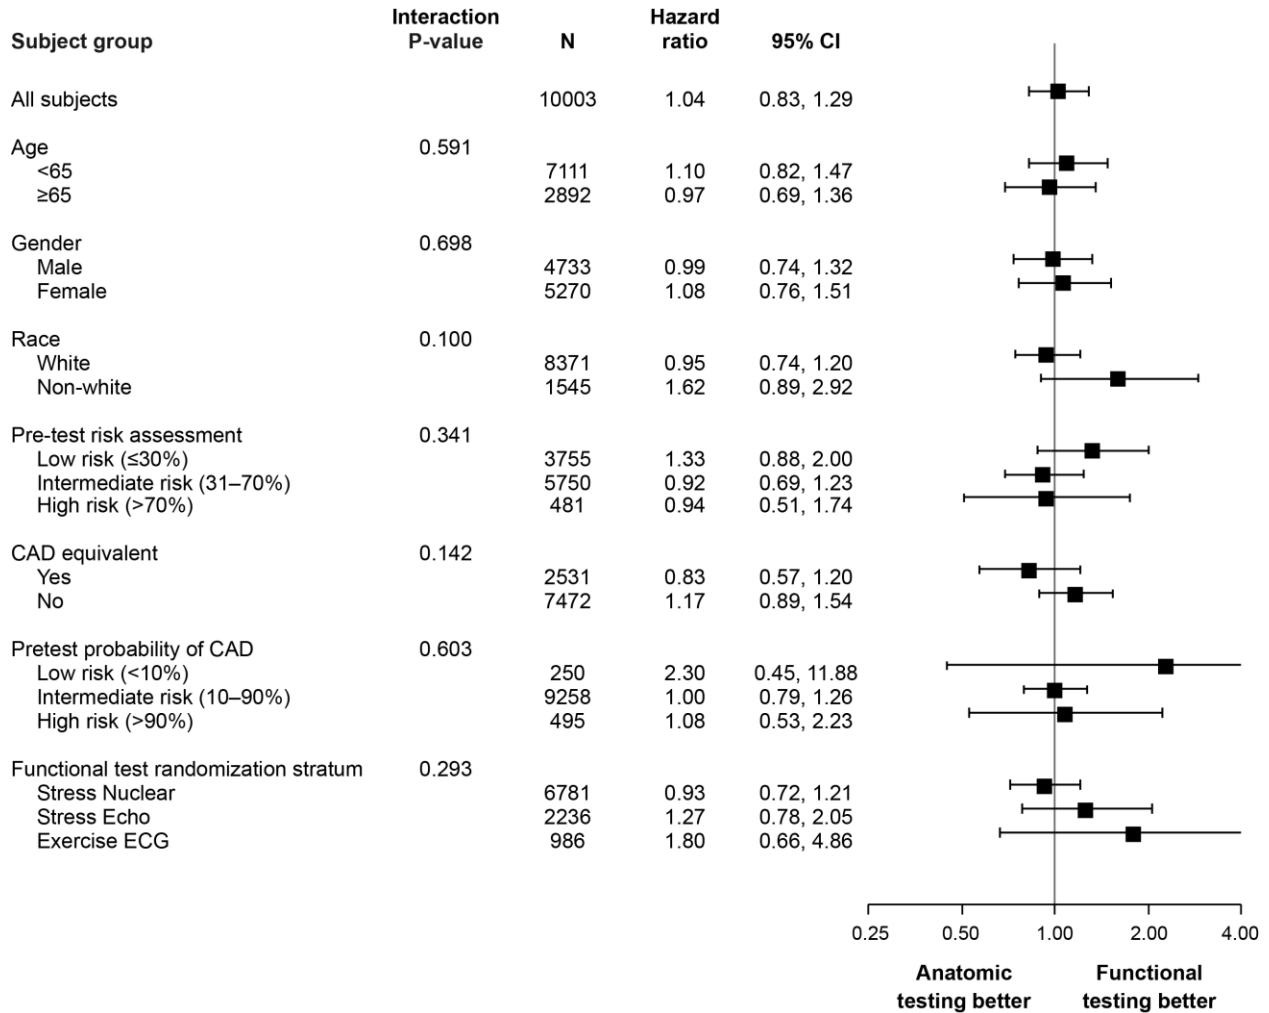

**B.**

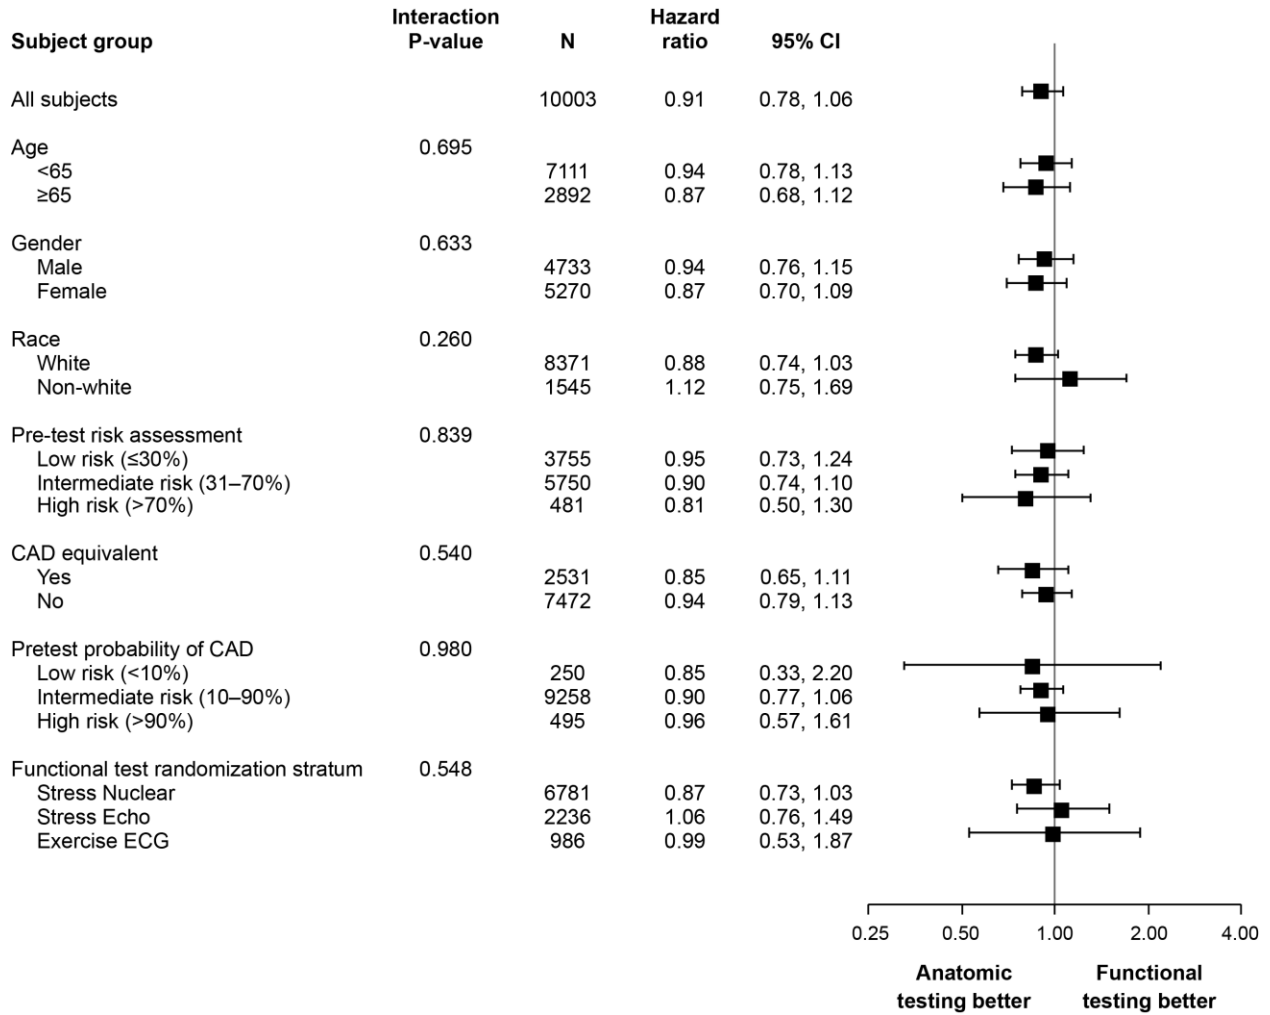

### Supplemental Figure S3. Cumulative Radiation Exposure at 90 Days after Randomization

The cumulative radiation exposure in patients randomized to each arm is shown as a waterfall plot, with the patients rank ordered by exposure on the x axis and displayed as percentiles, and exposure in mSv on the y axis. The flat initial line in each group represents patients who did not receive any radiation; this extends out to 32.6% in the functional testing arm.

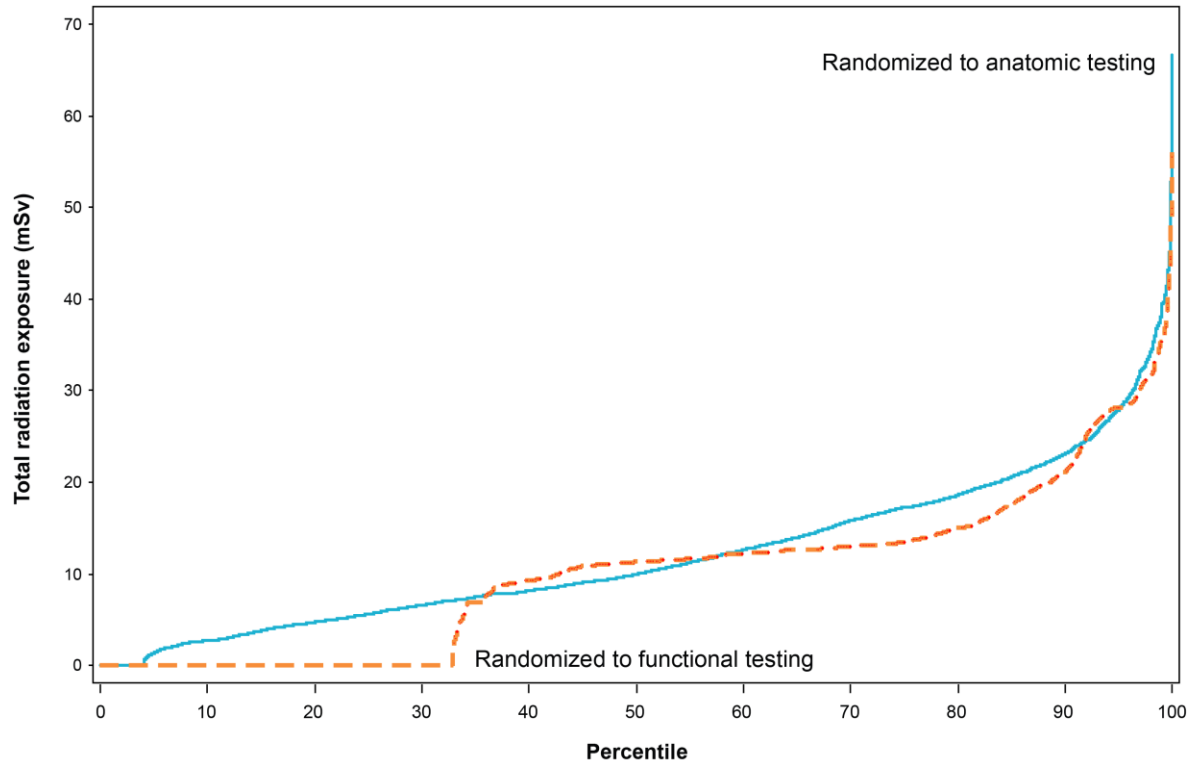

## Supplemental Table S1. Trial Inclusion and Exclusion Criteria\*

---

### Inclusion Criteria

1. New or worsening chest pain syndrome or equivalent symptoms suspicious for clinically significant CAD
2. No prior evaluation for this episode of symptoms
3. Planned non-invasive testing for diagnosis
4. Men age > 55 and women age ≥65 years
5. If age in men 45 - 54 or women 50 - 64 years, then must have increased probability of CAD due to EITHER:
  - A. Diabetes Mellitus (DM) requiring medical treatment OR Peripheral Arterial Disease (PAD) defined as documented >50% peripheral arterial stenosis treated medically or invasively OR cerebrovascular disease (stroke, documented > 50% carotid stenosis treated medically or invasively)
- OR
- B. At least one of the following cardiovascular risk factors:
  - Ongoing tobacco use
  - Hypertension
  - Abnormal ABI defined as less than <0.9
  - Dyslipidemia
6. Serum creatinine < 1.5 mg/dL within the past 90 days
7. Negative urine/serum pregnancy test for female subjects of child-bearing potential

### Exclusion Criteria

1. Diagnosed or suspected ACS requiring hospitalization or urgent or emergent testing; Elevated troponin or CK-MB
2. Hemodynamically or clinically unstable condition (systolic BP < 90 mmHg, atrial or ventricular arrhythmias, or persistent resting chest pain felt to be ischemic despite adequate therapy)
3. Known CAD with prior MI, PCI, CABG or any angiographic evidence of CAD ≥50% lesion in a major epicardial vessel.
4. Any invasive coronary angiography or non-invasive anatomic or functional CV test for detection of CAD, including CTA and exercise ECG, within the previous twelve (12) months.
5. Known significant congenital, valvular (> moderate) or cardiomyopathic process (hypertrophic cardiomyopathy or reduced systolic left ventricular function (LVEF ≤ 40%)) which could explain cardiac symptoms.
6. Contraindication to undergoing a CTA, including but not limited to:
  - A. Allergy to iodinated contrast agent
  - B. Unable to receive beta blockers unless heart rate < 65 beats per minute
  - C. Pregnancy
7. Life expectancy < 2 years
8. Unable to provide written informed consent or participate in long-term follow-up

---

\* ABI denotes ankle-brachial index; ACS, acute coronary syndromes; BP, blood pressure; CABG, coronary artery bypass grafting; CAD, coronary artery disease; CTA, computed tomographic angiography; CV, cardiovascular; ECG, electrocardiogram; MI, myocardial infarction; and PCI, percutaneous coronary intervention.

## Supplemental Table S2. Definitions of the Components of the Primary End Point

---

Primary End Point:

Time to first event using the composite of the following major cardiovascular events:

- Death
- Myocardial infarction
- Major complications from cardiovascular procedures including testing (stroke, major bleeding, anaphylaxis and renal failure)
- Unstable angina hospitalization

Definitions:

**All cause mortality:** All cause mortality is used rather than cardiac mortality to eliminate the need for possibly difficult adjudication of causes of death, especially given the relatively low mortality expected.

**Myocardial infarction:** defined as either 1) an abnormal cardiac biomarker level > institutional ULN (either troponin or CK-MB), and either ischemic discomfort lasting > 10 minutes or ECG changes indicative of ischemia or infarction, or 2) new abnormal Q waves consistent with infarction. Additionally *peri-procedural infarctions* are defined as >3x upper limit of normal for serum CK-MB for PCI and >5x upper limit of normal for CABG.

**Major complications from cardiovascular procedures and diagnostic testing** which occur within 72 hours, defined as:

- Stroke is defined as an acute focal neurological deficit of sudden onset, not reversible within 24 hours, or that resolves in <24 hrs with clear evidence of a new stroke on cerebral imaging
- Bleeding is defined as major based on one or more of the following:
  - Transfusion of > 2 units heterologous packed red blood cells or whole blood
  - Decrease in hemoglobin level by  $\geq 2.0$  g/l
  - Need for re-operation or invasive intervention (e.g. evacuation of wound hematoma)
  - Bleeding at a critical anatomic site (intracranial, intraspinal, intraocular, retroperitoneal, intra-articular, pericardial, or intramuscular with compartment syndrome)
- Renal Failure is defined as new requirement for renal replacement therapy
- Anaphylaxis is defined as a severe contrast reaction requiring emergency respiratory and/or circulatory support

**Unstable angina hospitalization:** defined as 1) ischemic discomfort or equivalent symptoms requiring hospitalization within 48 hours of symptoms, 2) lasting  $\geq 10$  minutes at rest, or in an accelerating pattern, 3) accompanied by dynamic ST depression, ischemia on stress testing or significant epicardial coronary artery stenosis, and 4) which is considered to be myocardial ischemia upon final diagnosis.

---



**Supplemental Table S3. Definitions of Positive Results from Diagnostic Tests**

**PROMISE trial**

**Initial Diagnostic Test Result Derivation**

This table summarizes the derivation of Initial Diagnostic Test Results from the anatomic and functional tests performed in the PROMISE trial for the SAP defined 2 point (Positive vs. Negative) categories.

**PROMISE Trial Primary Analysis Statistical Plan Section:**

**Classification of Initial Test Results (Positive vs. Negative)**

Among the information that will be reported from the trial is the site interpretation based percent of patients in the PROMISE study population whose initial diagnostic test was considered **positive**, whether randomized to CTA or to a functional test. For the purpose of this analysis, “positive” is considered as having some evidence of inducible ischemia on functional testing, or severity of stenosis on CTA likely to be associated with inducible ischemia. In this construct, evidence of prior infarct alone without ischemia is considered as “negative”, as is a normal test.

*For reporting this information, the following definitions will be used:*

**CTA** will be considered positive if there is a  $\geq 70\%$  stenosis in either the left anterior descending (LAD), left circumflex (LCX), or right coronary artery (RCA), or a  $\geq 50\%$  stenosis in the left main coronary artery.

*Positive Test Result. If any of these variables are true*

| Location                      | Level of stenosis                           |
|-------------------------------|---------------------------------------------|
| RCA (any)                     | Significant/severe (70-99%) Occluded (100%) |
| LAD (any except proximal LAD) | Significant/severe (70-99%) Occluded (100%) |
| Proximal LAD                  | Significant/severe (70-99%) Occluded (100%) |
| LCX (any)                     | Significant/severe (70-99%) Occluded (100%) |
| Left Main                     | Significant/severe (50-99%) Occluded (100%) |

*Negative Test Result. If no vessel is positive and at least 4 of 5 of these variables are reported and true (ie, at most one is not reported)*

| Location                      | Level of stenosis                     |
|-------------------------------|---------------------------------------|
| RCA (any)                     | Normal (0%)                           |
|                               | Non-significant/mild or minor (1-49%) |
|                               | Moderate (50-69%)                     |
| LAD (any except proximal LAD) | Normal (0%)                           |
|                               | Non-significant/mild or minor (1-49%) |
|                               | Moderate (50-69%)                     |
| Proximal LAD                  | Normal (0%)                           |
|                               | Non-significant/mild or minor (1-49%) |
|                               | Moderate (50-69%)                     |
| LCX (any)                     | Normal (0%)                           |
|                               | Non-significant/mild or minor (1-49%) |
|                               | Moderate (50-69%)                     |
| Left Main                     | Normal (0%)                           |
|                               | Non-significant/mild or minor (1-49%) |

*Indeterminate Test Result. If no vessel is positive and either Left Main result is true or Proximal LAD is true or at least 2 of the 3 remaining segments are true*

| Location                      | Level of stenosis             |
|-------------------------------|-------------------------------|
| RCA (any)                     | Indeterminate or Not reported |
| LAD (any except proximal LAD) | Indeterminate or Not reported |
| Proximal LAD                  | Indeterminate or Not reported |
| LCX (any)                     | Indeterminate or Not reported |
| Left Main                     | Indeterminate or Not reported |

For CAC only CTAs the results will be classified as the following:

- **Indeterminate for any CAC score**

### **Cardiac Catheterization**

Uses the same score system as CTA; only applies to patient who received an invasive catheterization as a first test.

### **Functional Testing**

**Stress Nuclear Imaging** will be considered positive if there is a reversible perfusion defect (inducible ischemia) or mixed defect (infarct and ischemia) during stress in at least one territory.

*Positive Test Result. If any of these variables are true*

| Territory              | Myocardial Perfusion                |
|------------------------|-------------------------------------|
| Septal/anterior/apical | Reversible (ischemia)               |
|                        | Mixed defect (infarct and Ischemia) |
| Lateral                | Reversible (ischemia)               |
|                        | Mixed defect (infarct and Ischemia) |
| Inferior/posterior     | Reversible (ischemia)               |
|                        | Mixed defect (infarct and Ischemia) |

*Negative Test Result. If no area is positive and 2 or more of these variables are true*

| Territory              | Myocardial Perfusion             |
|------------------------|----------------------------------|
| Septal/anterior/apical | Normal or Fixed defect (infarct) |
| Lateral                | Normal or Fixed defect (infarct) |
| Inferior/posterior     | Normal or Fixed defect (infarct) |

*Indeterminate Test Result. If no area is positive and 2 or more of these variables are true*

| Territory              | Myocardial Perfusion            |
|------------------------|---------------------------------|
| Septal/anterior/apical | Uninterpretable or Not reported |
| Lateral                | Uninterpretable or Not reported |
| Inferior/posterior     | Uninterpretable or Not reported |

**Stress Echo** will be considered positive if there is a reversible wall motion abnormality or mixed abnormality during stress in at least one territory.

Positive Test Result. If any of these variables are true

| Territory              | Wall motion abnormality                                                                  |
|------------------------|------------------------------------------------------------------------------------------|
| Septal/anterior/apical | Inducible wall motion abnormality (ischemia)<br>Mixed abnormality (infarct and ischemia) |
| Lateral                | Inducible wall motion abnormality (ischemia)<br>Mixed abnormality (infarct and ischemia) |
| Inferior/posterior     | Inducible wall motion abnormality (ischemia)<br>Mixed abnormality (infarct and ischemia) |

Negative Test Result. If no positive results and 2 or more of these variables are true (i.e. at most one not reported)

| Territory              | Wall motion abnormality                                              |
|------------------------|----------------------------------------------------------------------|
| Septal/anterior/apical | Normal<br>Resting Wall motion abnormality without ischemia (infarct) |
| Lateral                | Normal<br>Resting Wall motion abnormality without ischemia (infarct) |
| Inferior/posterior     | Normal<br>Resting Wall motion abnormality without ischemia (infarct) |

Indeterminate Test Result. If no positives and 2 or more of these variables are true

| Territory              | Wall motion abnormality         |
|------------------------|---------------------------------|
| Septal/anterior/apical | Uninterpretable or Not reported |
| Lateral                | Uninterpretable or Not reported |
| Inferior/posterior     | Uninterpretable or Not reported |

**Exercise ECG** will be considered positive if there are significant ST-segment changes consistent with ischemia.

Positive Test Result

| Question                            | ECG result |
|-------------------------------------|------------|
| Changes meet criteria for ischemia? | Positive   |

Negative Test Result

| Question                            | ECG result                                                       |
|-------------------------------------|------------------------------------------------------------------|
| Changes meet criteria for ischemia? | Negative, no evidence of ischemia<br>Borderline or indeterminate |

Indeterminate Test Result

| Question                            | ECG result       |
|-------------------------------------|------------------|
| Changes meet criteria for ischemia? | Noninterpretable |

These classifications will be based on site-reported assessments.

**Supplemental Table S4. Outcomes According to Study Group at 12 Months\***

|                                                           | 12-Month Outcomes        |                                    |                                      | <i>P</i> Value |
|-----------------------------------------------------------|--------------------------|------------------------------------|--------------------------------------|----------------|
|                                                           | CTA strategy<br>(N=4996) | Functional<br>strategy<br>(N=5007) | Adjusted<br>Hazard Ratio<br>(95% CI) |                |
| Primary end point composite                               | 88                       | 91                                 | 0.94<br>(0.70–1.26)                  | 0.682          |
| All cause death                                           | 21                       | 32                                 |                                      |                |
| Nonfatal MI                                               | 18                       | 27                                 |                                      |                |
| Unstable angina hospitalization                           | 49                       | 34                                 |                                      |                |
| Major procedural complications                            | 4                        | 5                                  |                                      |                |
| Primary end point plus cath without<br>obstructive CAD    | 256                      | 296                                | 0.85<br>(0.72–1.00)                  | 0.055          |
| Death or nonfatal MI                                      | 39                       | 57                                 | 0.66<br>(0.44–1.00)                  | 0.049          |
| Death, nonfatal MI, or unstable<br>angina hospitalization | 86                       | 88                                 | 0.95<br>(0.71–1.28)                  | 0.736          |

\* CAD denotes coronary artery disease; CTA, computed tomographic angiography; and MI, myocardial infarction.

Hazard ratios were adjusted for age, sex, CAD risk equivalent (history of either diabetes, peripheral arterial disease, or cerebrovascular disease), and the pre-specification of the intended functional test if randomized to the functional testing arm.

**Supplemental Table S5. Diagnostic Test Adverse Events and Serious Adverse Events by Testing Modality**

|                                                                | <b>Anatomic Testing<br/>(N=4996)</b> | <b>Functional Testing<br/>(N=5007)</b> | <b>All Patients<br/>(N=10003)</b> |
|----------------------------------------------------------------|--------------------------------------|----------------------------------------|-----------------------------------|
| <b>Safety events</b>                                           |                                      |                                        |                                   |
| Number of patients with any safety event                       | 37                                   | 21                                     | 58                                |
| Type of safety events <sup>a</sup>                             |                                      |                                        |                                   |
| Exercise induced hypotension (BP fall >20 mmHg)                | 0                                    | 6                                      | 6                                 |
| Stress induced symptoms (not resolve <20 min)                  | 0                                    | 4                                      | 4                                 |
| Rapid atrial fibrillation that does not slow or convert        | 0                                    | 0                                      | 0                                 |
| Ventricular tachycardia                                        | 0                                    | 4                                      | 4                                 |
| Hemodynamic instability (systolic BP <80 mmHg)                 | 0                                    | 2                                      | 2                                 |
| Hospital admission not in the primary end point <sup>b</sup>   | 0                                    | 5                                      | 5                                 |
| Stress induced wall motion abnormality <sup>c</sup>            | 0                                    | 0                                      | 0                                 |
| Any anaphylactic reaction to contrast agent <sup>d</sup>       | 0                                    | 0                                      | 0                                 |
| Any events potentially related to vasodilators <sup>e</sup>    | 0                                    | 5                                      | 5                                 |
| Mild contrast reaction such as rash and hives <sup>f</sup>     | 22                                   | 0                                      | 22                                |
| Extravasation of contrast into surrounding tissue <sup>g</sup> | 12                                   | 0                                      | 12                                |
| Hemodynamic instability <sup>h</sup>                           | 3                                    | 0                                      | 3                                 |
| Acute bronchospasm <sup>i</sup>                                | 0                                    | 0                                      | 0                                 |
| <b>Major complications</b>                                     |                                      |                                        |                                   |
| Number of patients with any major complication                 | 4                                    | 5                                      | 9                                 |
| Type of major complications <sup>a</sup>                       |                                      |                                        |                                   |
| Stroke                                                         | 1                                    | 2                                      | 3                                 |
| Major bleeding                                                 | 3                                    | 3                                      | 6                                 |
| Anaphylaxis                                                    | 0                                    | 0                                      | 0                                 |
| Renal failure requiring dialysis                               | 0                                    | 0                                      | 0                                 |

<sup>a</sup>Multiple choices possible.

<sup>b</sup>Hospital admission not otherwise captured by the primary end point including that precipitated by any symptomatic event (chest pain, dyspnea, etc), persistent or worsening ischemic ECG changes, any bradycardic or tachycardic arrhythmia, or any hemodynamic changes (hyper- or hypo-tension).

<sup>c</sup>Stress induced wall motion abnormality that does not resolve within 20 minutes (despite treatment).

<sup>d</sup>Any anaphylactic reaction to contrast agent not requiring circulatory or respiratory support.

<sup>e</sup>Any events potentially related to the use of vasodilators such as dipyridamole or adenosine, including an anaphylactic reaction to contrast agent not requiring circulatory or respiratory support.

<sup>f</sup>Mild contrast reaction such as rash and hives (severe reactions including anaphylaxis or death are part of the primary end point).

<sup>g</sup>Extravasation of contrast into the surrounding tissue of the extremity where the IV was placed and contrast administered.

<sup>h</sup>Hemodynamic instability, including symptomatic bradycardia or hypotension, due to the beta blockade or nitrates given for the CTA scan acquisition.

<sup>i</sup>Acute bronchospasm due to the beta blockade given for the CTA scan.

## Patient and Provider Educational Materials

### AHA Guidelines for Primary Prevention of Cardiovascular Disease and Stroke: 2002 Update (Adapted from *Circulation* 2002;106:388-391)

Consensus Panel Guide to Comprehensive Risk Reduction for Adult Patients Without Coronary or Other Atherosclerotic Vascular Diseases

| <b>Smoking</b>                |                                                                                                                                                                                                                                                                                                                                                                                                                                                                                                                                                                                                                                                                                                                                                                                                                                                                                                                                                            |
|-------------------------------|------------------------------------------------------------------------------------------------------------------------------------------------------------------------------------------------------------------------------------------------------------------------------------------------------------------------------------------------------------------------------------------------------------------------------------------------------------------------------------------------------------------------------------------------------------------------------------------------------------------------------------------------------------------------------------------------------------------------------------------------------------------------------------------------------------------------------------------------------------------------------------------------------------------------------------------------------------|
| <b>Goal</b>                   | <ul style="list-style-type: none"> <li>• Complete cessation.</li> <li>• No exposure to environmental tobacco smoke.</li> </ul>                                                                                                                                                                                                                                                                                                                                                                                                                                                                                                                                                                                                                                                                                                                                                                                                                             |
| <b>Interventions</b>          | <ul style="list-style-type: none"> <li>• Ask about tobacco use status at every visit.</li> <li>• In a clear, strong, and personalized manner, advise every tobacco user to quit.</li> <li>• Assess the tobacco user's willingness to quit.</li> <li>• Assist by counseling and developing a plan for quitting.</li> <li>• Arrange follow-up, referral to special programs, or pharmacotherapy.</li> <li>• Urge avoidance of exposure to secondhand smoke at work or home.</li> </ul>                                                                                                                                                                                                                                                                                                                                                                                                                                                                       |
| <b>Blood Pressure Control</b> |                                                                                                                                                                                                                                                                                                                                                                                                                                                                                                                                                                                                                                                                                                                                                                                                                                                                                                                                                            |
| <b>Goal</b>                   | <ul style="list-style-type: none"> <li>• &lt; 140/90 mm Hg</li> <li>• &lt; 130/85 mm Hg if renal insufficiency or heart failure is present</li> <li>• &lt; 130/80 mm Hg if diabetes is present.</li> </ul>                                                                                                                                                                                                                                                                                                                                                                                                                                                                                                                                                                                                                                                                                                                                                 |
| <b>Interventions</b>          | <ul style="list-style-type: none"> <li>• Promote healthy lifestyle modification.</li> <li>• Advocate weight reduction; reduction of sodium intake; consumption of fruits, vegetables, and low-fat dairy products; moderation of alcohol intake; and physical activity in persons with BP of <math>\geq 130</math> mm Hg systolic or 80 mm Hg diastolic.</li> <li>• For persons with renal insufficiency or heart failure, initiate drug therapy if BP is <math>\geq 130</math> mm Hg systolic or 85 mm Hg diastolic (<math>\geq 80</math> mm Hg diastolic for patients with diabetes).</li> <li>• Initiate drug therapy for those with BP <math>\geq 140/90</math> mm Hg if 6 to 12 months of lifestyle modification is not effective, depending on the number of risk factors present.</li> <li>• Add BP medications, individualized to other patient requirements and characteristics (eg, age, race, need for drugs with specific benefits).</li> </ul> |
| <b>Dietary Intake</b>         |                                                                                                                                                                                                                                                                                                                                                                                                                                                                                                                                                                                                                                                                                                                                                                                                                                                                                                                                                            |
| <b>Goal</b>                   | <ul style="list-style-type: none"> <li>• An overall healthy eating pattern.</li> </ul>                                                                                                                                                                                                                                                                                                                                                                                                                                                                                                                                                                                                                                                                                                                                                                                                                                                                     |
| <b>Interventions</b>          | <ul style="list-style-type: none"> <li>• Advocate consumption of a variety of fruits, vegetables, grains, low-fat or nonfat dairy products, fish, legumes, poultry, and lean meats.</li> <li>• Match energy intake with energy needs and make appropriate changes to achieve weight loss when indicated.</li> <li>• Modify food choices to reduce saturated fats (&lt; 10% of calories), cholesterol (&lt; 300 mg/d), and <i>trans</i>-fatty acids by substituting grains and unsaturated fatty acids from fish, vegetables, legumes, and nuts.</li> <li>• Limit salt intake to &lt; 6 g/d.</li> <li>• Limit alcohol intake (<math>\leq 2</math> drinks/d in men, <math>\leq 1</math> drink/d in women) among those who drink.</li> </ul>                                                                                                                                                                                                                  |

| <b>Weight Management</b>      |                                                                                                                                                                                                                                                                                                                                                                                                                                                                                                                                                                                                                                                                                                                                                                                                                                                                                                                                                                                                                                                                                                                                                                                                                                                                                                                                                                                                                                           |
|-------------------------------|-------------------------------------------------------------------------------------------------------------------------------------------------------------------------------------------------------------------------------------------------------------------------------------------------------------------------------------------------------------------------------------------------------------------------------------------------------------------------------------------------------------------------------------------------------------------------------------------------------------------------------------------------------------------------------------------------------------------------------------------------------------------------------------------------------------------------------------------------------------------------------------------------------------------------------------------------------------------------------------------------------------------------------------------------------------------------------------------------------------------------------------------------------------------------------------------------------------------------------------------------------------------------------------------------------------------------------------------------------------------------------------------------------------------------------------------|
| <b>Goal</b>                   | <ul style="list-style-type: none"> <li>• Achieve and maintain desirable weight (body mass index 18.5–24.9 kg/m<sup>2</sup>).</li> <li>• When body mass index is <math>\geq 25</math> kg/m<sup>2</sup>, waist circumference at iliac crest level <math>\leq 40</math> inches in men, <math>\leq 35</math> inches in women</li> </ul>                                                                                                                                                                                                                                                                                                                                                                                                                                                                                                                                                                                                                                                                                                                                                                                                                                                                                                                                                                                                                                                                                                       |
| <b>Interventions</b>          | <ul style="list-style-type: none"> <li>• Initiate weight-management program through caloric restriction and increased caloric expenditure as appropriate.</li> <li>• For overweight/obese persons, reduce body weight by 10% in first year of therapy.</li> </ul>                                                                                                                                                                                                                                                                                                                                                                                                                                                                                                                                                                                                                                                                                                                                                                                                                                                                                                                                                                                                                                                                                                                                                                         |
| <b>Aspirin</b>                |                                                                                                                                                                                                                                                                                                                                                                                                                                                                                                                                                                                                                                                                                                                                                                                                                                                                                                                                                                                                                                                                                                                                                                                                                                                                                                                                                                                                                                           |
| <b>Goal</b>                   | Low-dose aspirin in persons at higher CHD risk (especially those with 10-y risk of CHD $\geq 10\%$ ).                                                                                                                                                                                                                                                                                                                                                                                                                                                                                                                                                                                                                                                                                                                                                                                                                                                                                                                                                                                                                                                                                                                                                                                                                                                                                                                                     |
| <b>Interventions</b>          | <ul style="list-style-type: none"> <li>• Do not recommend for patients with aspirin intolerance.</li> <li>• Low-dose aspirin increases risk for gastrointestinal bleeding and hemorrhagic stroke. Do not use in persons at increased risk for these diseases.</li> <li>• Benefits of cardiovascular risk reduction outweigh these risks in most patients at higher coronary risk.</li> <li>• Doses of 75–160 mg/d are as effective as higher doses. Therefore, consider 75–160 mg aspirin per day for persons at higher risk (especially those with 10-y risk of CHD of <math>\geq 10\%</math>).</li> </ul>                                                                                                                                                                                                                                                                                                                                                                                                                                                                                                                                                                                                                                                                                                                                                                                                                               |
| <b>Blood Lipid Management</b> |                                                                                                                                                                                                                                                                                                                                                                                                                                                                                                                                                                                                                                                                                                                                                                                                                                                                                                                                                                                                                                                                                                                                                                                                                                                                                                                                                                                                                                           |
| <b>Goal</b>                   | <p><b>Primary goal</b></p> <ul style="list-style-type: none"> <li>• LDL-C <math>&lt; 160</math> mg/dL if <math>\leq 1</math> risk factor is present;</li> <li>• LDL-C <math>&lt; 130</math> mg/dL if <math>\geq 2</math> risk factors are present and 10-y CHD risk is <math>&lt; 20\%</math>;</li> <li>• LDL-C <math>&lt; 100</math> mg/dL if <math>\geq 2</math> risk factors are present and 10-y CHD risk is <math>\geq 20\%</math> or if patient has diabetes.</li> </ul> <p><b>Secondary goals</b> (if LDL-C is at goal range)<br/>If triglycerides are <math>&gt; 200</math> mg/dL, then use non-HDL-C as a secondary goal</p> <ul style="list-style-type: none"> <li>• Non-HDL-C <math>&lt; 190</math> mg/dL for <math>\leq 1</math> risk factor</li> <li>• Non-HDL-C <math>&lt; 160</math> mg/dL for <math>\geq 2</math> risk factors and 10-y CHD risk <math>\leq 20\%</math></li> <li>• Non-HDL-C <math>&lt; 130</math> mg/dL for diabetics or for <math>\geq 2</math> risk factors and 10-y CHD risk <math>&gt; 20\%</math></li> </ul> <p><b>Other targets for therapy</b></p> <ul style="list-style-type: none"> <li>• Triglycerides <math>&gt; 150</math> mg/dL</li> <li>• HDL-C <math>&lt; 40</math> mg/dL in men and <math>&lt; 50</math> mg/dL in women</li> </ul>                                                                                                                                                       |
| <b>Interventions</b>          | <ul style="list-style-type: none"> <li>• If LDL-C is above goal range, initiate additional therapeutic lifestyle changes consisting of dietary modifications to lower LDL-C: <math>&lt; 7\%</math> of calories from saturated fat, cholesterol <math>&lt; 200</math> mg/d, and, if further LDL-C lowering is required, dietary options (plant stanols/sterols not to exceed 2 g/d and/or increased viscous [soluble] fiber [10–25 g/d]), and additional emphasis on weight reduction and physical activity.</li> <li>• If LDL-C is above goal range, rule out secondary causes (liver function test, thyroid-stimulating hormone level, urinalysis).</li> <li>• After 12 weeks of therapeutic lifestyle change, consider LDL-lowering drug therapy if: <math>\geq 2</math> risk factors are present, 10-y risk is <math>&gt; 10\%</math>, and LDL-C is <math>\geq 130</math> mg/dL; <math>\geq 2</math> risk factors are present, 10-y risk is <math>&lt; 10\%</math>, and LDL-C is <math>\geq 160</math> mg/dL; or <math>\leq 1</math> risk factor is present and LDL-C is <math>\geq 190</math> mg/dL.</li> <li>• Start drugs and advance dose to bring LDL-C to goal range, usually a statin but also consider bile acid-binding resin or niacin.</li> <li>• If LDL-C goal not achieved, consider combination therapy (statin+resin, statin+niacin).</li> </ul> <p>After LDL-C goal has been reached, consider triglyceride level:</p> |

|                                    |                                                                                                                                                                                                                                                                                                                                                                                                                                                                                                                                                                                                                                                                                                                                                                                                                        |
|------------------------------------|------------------------------------------------------------------------------------------------------------------------------------------------------------------------------------------------------------------------------------------------------------------------------------------------------------------------------------------------------------------------------------------------------------------------------------------------------------------------------------------------------------------------------------------------------------------------------------------------------------------------------------------------------------------------------------------------------------------------------------------------------------------------------------------------------------------------|
|                                    | <ul style="list-style-type: none"> <li>• If 150–199 mg/dL, treat with therapeutic lifestyle changes.</li> <li>• If 200–499 mg/dL, treat elevated non-HDL-C with therapeutic lifestyle changes and, if necessary, consider higher doses of statin or adding niacin or fibrate.</li> <li>• If &gt; 500 mg/dL, treat with fibrate or niacin to reduce risk of pancreatitis.</li> <li>• If HDL-C is &lt; 40 mg/dL in men and &lt; 50 mg/dL in women, initiate or intensify therapeutic lifestyle changes.</li> <li>• For higher-risk patients, consider drugs that raise HDL-C (eg, niacin, fibrates, statins).</li> </ul>                                                                                                                                                                                                 |
| <b>Physical Activity</b>           |                                                                                                                                                                                                                                                                                                                                                                                                                                                                                                                                                                                                                                                                                                                                                                                                                        |
| <b>Goal</b>                        | <ul style="list-style-type: none"> <li>• At least 30 min of moderate-intensity physical activity on most (and preferably all) days of the week.</li> </ul>                                                                                                                                                                                                                                                                                                                                                                                                                                                                                                                                                                                                                                                             |
| <b>Interventions</b>               | <ul style="list-style-type: none"> <li>• If cardiovascular, respiratory, metabolic, orthopedic, or neurological disorders are suspected, or if patient is middle-aged or older and is sedentary, consult physician before initiating vigorous exercise program.</li> <li>• Moderate-intensity activities (40% to 60% of maximum capacity) are equivalent to a brisk walk (15–20 min per mile). Additional benefits are gained from vigorous-intensity activity (&gt; 60% of maximum capacity) for 20–40 min on 3–5 d/wk.</li> <li>• Recommend resistance training with 8–10 different exercises, 1–2 sets per exercise, and 10–15 repetitions at moderate intensity <math>\geq 2</math> d/wk.</li> <li>• Flexibility training and an increase in daily lifestyle activities should complement this regimen.</li> </ul> |
| <b>Diabetes Management</b>         |                                                                                                                                                                                                                                                                                                                                                                                                                                                                                                                                                                                                                                                                                                                                                                                                                        |
| <b>Goal</b>                        | Normal fasting plasma glucose (< 110 mg/dL) and near normal HbA1c (< 7%).                                                                                                                                                                                                                                                                                                                                                                                                                                                                                                                                                                                                                                                                                                                                              |
| <b>Interventions</b>               | <ul style="list-style-type: none"> <li>• Initiate appropriate hypoglycemic therapy to achieve near-normal fasting plasma glucose or as indicated by near-normal HbA1c. <ol style="list-style-type: none"> <li>1. First step is diet and exercise.</li> <li>2. Second-step therapy is usually oral hypoglycemic drugs: sulfonylureas and/or metformin with ancillary use of acarbose and thiazolidinediones.</li> <li>3. Third step therapy is insulin.</li> </ol> </li> <li>• Treat other risk factors more aggressively (eg, change BP goal to &lt; 130/80 mm Hg and LDL-C goal to &lt; 100 mg/dL).</li> </ul>                                                                                                                                                                                                        |
| <b>Chronic Atrial Fibrillation</b> |                                                                                                                                                                                                                                                                                                                                                                                                                                                                                                                                                                                                                                                                                                                                                                                                                        |
| <b>Goal</b>                        | Normal sinus rhythm or, if chronic atrial fibrillation is present, anticoagulation with INR 2.0–3.0 (target 2.5).                                                                                                                                                                                                                                                                                                                                                                                                                                                                                                                                                                                                                                                                                                      |
| <b>Interventions</b>               | <ul style="list-style-type: none"> <li>• Irregular pulse should be verified by an electrocardiogram.</li> <li>• Conversion of appropriate individuals to normal sinus rhythm.</li> <li>• For patients in chronic or intermittent atrial fibrillation, use warfarin anticoagulants to INR 2.0–3.0 (target 2.5).</li> <li>• Aspirin (325 mg/d) can be used as an alternative in those with certain contraindications to oral anticoagulation.</li> <li>• Patients &lt; 65 y of age without high risk may be treated with aspirin.</li> </ul>                                                                                                                                                                                                                                                                             |



**AHA/ACC Secondary Prevention for Patients With Coronary and Other Vascular Disease: 2006 Update  
(Adapted from *Circulation*. 2006;113:2363-2372)**

Patients covered by these guidelines include those with established coronary and other atherosclerotic vascular disease, including peripheral arterial disease, atherosclerotic aortic disease, and carotid artery disease.

| <b>Smoking</b>                |                                                                                                                                                                                                                                                                                                                                                                                                                                                                                                                                                                                                                                                                                                                               |
|-------------------------------|-------------------------------------------------------------------------------------------------------------------------------------------------------------------------------------------------------------------------------------------------------------------------------------------------------------------------------------------------------------------------------------------------------------------------------------------------------------------------------------------------------------------------------------------------------------------------------------------------------------------------------------------------------------------------------------------------------------------------------|
| <b>Goal</b>                   | <ul style="list-style-type: none"> <li>• Complete cessation.</li> <li>• No exposure to environmental tobacco smoke.</li> </ul>                                                                                                                                                                                                                                                                                                                                                                                                                                                                                                                                                                                                |
| <b>Interventions</b>          | <ul style="list-style-type: none"> <li>• Ask about tobacco use status at every visit.</li> <li>• Advise tobacco user to quit.</li> <li>• Assess the tobacco user's willingness to quit.</li> <li>• Assist by counseling and developing a plan for quitting.</li> <li>• Arrange follow-up, referral to special programs, or pharmacotherapy (including nicotine replacement and bupropion).</li> <li>• Urge avoidance of exposure to environmental tobacco smoke at work or home.</li> </ul>                                                                                                                                                                                                                                   |
| <b>Blood Pressure Control</b> |                                                                                                                                                                                                                                                                                                                                                                                                                                                                                                                                                                                                                                                                                                                               |
| <b>Goal</b>                   | <ul style="list-style-type: none"> <li>• &lt; 140/90 mm Hg</li> <li>• &lt; 130/80 mm Hg if patient has diabetes or chronic kidney disease.</li> </ul>                                                                                                                                                                                                                                                                                                                                                                                                                                                                                                                                                                         |
| <b>Interventions</b>          | <p><b>For all patients:</b></p> <ul style="list-style-type: none"> <li>• Initiate or maintain lifestyle modification—weight control; increased physical activity; alcohol moderation; sodium reduction; and emphasis on increased consumption of fresh fruits, vegetables, and low-fat dairy products.</li> </ul> <p><b>For patients with blood pressure <math>\geq</math> 140/90 mm Hg (or <math>\geq</math> 130/80 with chronic kidney disease or diabetes):</b></p> <ul style="list-style-type: none"> <li>• As tolerated, add blood pressure medication, treating initially with beta blockers and/or ACE inhibitors, with addition of other drugs such as thiazides as needed to achieve goal blood pressure.</li> </ul> |
| <b>Lipid Management</b>       |                                                                                                                                                                                                                                                                                                                                                                                                                                                                                                                                                                                                                                                                                                                               |
| <b>Goal</b>                   | <ul style="list-style-type: none"> <li>• LDL-C &lt;100 mg/dL</li> <li>• If triglycerides are <math>\geq</math> 200 mg/dL, non-HDL-C should be &lt;130 mg/dL</li> </ul>                                                                                                                                                                                                                                                                                                                                                                                                                                                                                                                                                        |
| <b>Interventions</b>          | <p><b>For all patients:</b></p> <ul style="list-style-type: none"> <li>• Start dietary therapy. Reduce intake of saturated fats (to &lt; 7% of total calories), <i>trans</i>-fatty acids, and cholesterol (to &lt; 200 mg/d).</li> <li>• Adding plant stanol/sterols (2 g/d) and viscous fiber (&gt; 10 g/d) will further lower LDL-C.</li> <li>• Promote daily physical activity and weight management.</li> <li>• Encourage increased consumption of omega-3 fatty acids in the form of fish or in capsule form (1 g/d) for risk reduction. For treatment of elevated triglycerides, higher doses are usually necessary for risk reduction.</li> </ul>                                                                      |

|                                       |                                                                                                                                                                                                                                                                                                                                                                                                                                                                                                                                                                                                                                                                                                                                                                                                                                                                                                                                                                                                                                                                                                                                                                                                                                                                                                                                                                                                                                                                                                      |
|---------------------------------------|------------------------------------------------------------------------------------------------------------------------------------------------------------------------------------------------------------------------------------------------------------------------------------------------------------------------------------------------------------------------------------------------------------------------------------------------------------------------------------------------------------------------------------------------------------------------------------------------------------------------------------------------------------------------------------------------------------------------------------------------------------------------------------------------------------------------------------------------------------------------------------------------------------------------------------------------------------------------------------------------------------------------------------------------------------------------------------------------------------------------------------------------------------------------------------------------------------------------------------------------------------------------------------------------------------------------------------------------------------------------------------------------------------------------------------------------------------------------------------------------------|
| <b>Lipid Management Interventions</b> | <p><b>For lipid management:</b></p> <p>Assess fasting lipid profile in all patients, and within 24 hours of hospitalization for those with an acute cardiovascular or coronary event. For hospitalized patients, initiate lipid-lowering medication as recommended below before discharge according to the following schedule:</p> <ul style="list-style-type: none"> <li>• LDL-C should be &lt; 100 mg/dL</li> <li>• Further reduction of LDL-C to &lt; 70 mg/dL is reasonable.</li> <li>• If baseline LDL-C is ≥ 100 mg/dL, initiate LDL-lowering drug therapy.</li> <li>• If on-treatment LDL-C is ≥100 mg/dL, intensify LDL-lowering drug therapy (may require LDL-lowering drug combination).</li> <li>• If baseline LDL-C is 70 to 100 mg/dL, it is reasonable to treat to LDL-C &lt; 70 mg/dL.</li> <li>• If triglycerides are 200 to 499 mg/dL, non-HDL-C should be &lt; 130 mg/dL.</li> <li>• Further reduction of non-HDL-C to &lt; 100 mg/dL is reasonable.</li> <li>• Therapeutic options to reduce non-HDL-C are: <ul style="list-style-type: none"> <li>→ More intense LDL-C-lowering therapy</li> <li>→ Niacin (after LDL-C-lowering therapy)</li> <li>→ Fibrate therapy (after LDL-C-lowering therapy)</li> </ul> </li> <li>• If triglycerides are ≥ 500 mg/dL, therapeutic options to prevent pancreatitis are fibrate or niacin before LDL-lowering therapy; and treat LDL-C to goal after triglyceride-lowering therapy. Achieve non-HDL-C &lt; 130 mg/dL if possible.</li> </ul> |
| <b>Physical Activity</b>              |                                                                                                                                                                                                                                                                                                                                                                                                                                                                                                                                                                                                                                                                                                                                                                                                                                                                                                                                                                                                                                                                                                                                                                                                                                                                                                                                                                                                                                                                                                      |
| <b>Goal</b>                           | <ul style="list-style-type: none"> <li>• 30 minutes, 7 days per week (minimum 5 days per week)</li> </ul>                                                                                                                                                                                                                                                                                                                                                                                                                                                                                                                                                                                                                                                                                                                                                                                                                                                                                                                                                                                                                                                                                                                                                                                                                                                                                                                                                                                            |
| <b>Interventions</b>                  | <ul style="list-style-type: none"> <li>• For all patients, assess risk with a physical activity history and/or an exercise test, to guide prescription.</li> <li>• For all patients, encourage 30 to 60 minutes of moderate-intensity aerobic activity, such as brisk walking, on most, preferably all, days of the week, supplemented by an increase in daily lifestyle activities (eg, walking breaks at work, gardening, household work).</li> <li>• Encourage resistance training 2 days per week.</li> <li>• Advise medically supervised programs for high-risk patients (eg, recent acute coronary syndrome or revascularization, heart failure).</li> </ul>                                                                                                                                                                                                                                                                                                                                                                                                                                                                                                                                                                                                                                                                                                                                                                                                                                   |
| <b>Weight Management</b>              |                                                                                                                                                                                                                                                                                                                                                                                                                                                                                                                                                                                                                                                                                                                                                                                                                                                                                                                                                                                                                                                                                                                                                                                                                                                                                                                                                                                                                                                                                                      |
| <b>Goal</b>                           | <ul style="list-style-type: none"> <li>• Body mass index 18.5–24.9 kg/m<sup>2</sup>).</li> <li>• Waist circumference: men &lt; 40 inches, women &lt; 35 inches in women.</li> </ul>                                                                                                                                                                                                                                                                                                                                                                                                                                                                                                                                                                                                                                                                                                                                                                                                                                                                                                                                                                                                                                                                                                                                                                                                                                                                                                                  |
| <b>Interventions</b>                  | <ul style="list-style-type: none"> <li>• Assess body mass index and/or waist circumference on each visit and consistently encourage weight maintenance/reduction through an appropriate balance of physical activity, caloric intake, and formal behavioral programs when indicated to maintain/achieve a body mass index between 18.5 and 24.9 kg/m<sup>2</sup>.</li> <li>• If waist circumference (measured horizontally at the iliac crest) is ≥ 35 inches in women and ; ≥ 40 inches in men, initiate lifestyle changes and consider treatment strategies for metabolic syndrome as indicated.</li> </ul>                                                                                                                                                                                                                                                                                                                                                                                                                                                                                                                                                                                                                                                                                                                                                                                                                                                                                        |

|                                                      |                                                                                                                                                                                                                                                                                                                                                                                                                                                                                                                                                                                                                                                                                                                                                                                                                                                                                                                                                                                                                                                                                                                                                                                                                                                                                                                                                                                                                                                                                                                                                                        |
|------------------------------------------------------|------------------------------------------------------------------------------------------------------------------------------------------------------------------------------------------------------------------------------------------------------------------------------------------------------------------------------------------------------------------------------------------------------------------------------------------------------------------------------------------------------------------------------------------------------------------------------------------------------------------------------------------------------------------------------------------------------------------------------------------------------------------------------------------------------------------------------------------------------------------------------------------------------------------------------------------------------------------------------------------------------------------------------------------------------------------------------------------------------------------------------------------------------------------------------------------------------------------------------------------------------------------------------------------------------------------------------------------------------------------------------------------------------------------------------------------------------------------------------------------------------------------------------------------------------------------------|
|                                                      | <ul style="list-style-type: none"> <li>The initial goal of weight loss therapy should be to reduce body weight by approximately 10% from baseline. With success, further weight loss can be attempted if indicated through further assessment.</li> </ul>                                                                                                                                                                                                                                                                                                                                                                                                                                                                                                                                                                                                                                                                                                                                                                                                                                                                                                                                                                                                                                                                                                                                                                                                                                                                                                              |
| <b>Diabetes Management</b>                           |                                                                                                                                                                                                                                                                                                                                                                                                                                                                                                                                                                                                                                                                                                                                                                                                                                                                                                                                                                                                                                                                                                                                                                                                                                                                                                                                                                                                                                                                                                                                                                        |
| <b>Goal</b>                                          | <ul style="list-style-type: none"> <li>HbA1c &lt; 7%</li> </ul>                                                                                                                                                                                                                                                                                                                                                                                                                                                                                                                                                                                                                                                                                                                                                                                                                                                                                                                                                                                                                                                                                                                                                                                                                                                                                                                                                                                                                                                                                                        |
| <b>Interventions</b>                                 | <ul style="list-style-type: none"> <li>Initiate lifestyle and pharmacotherapy to achieve near-normal HbA1c.</li> <li>Begin vigorous modification of other risk factors (eg, physical activity, weight management, blood pressure control, and cholesterol management as recommended above).</li> <li>Coordinate diabetic care with patient's primary care physician or endocrinologist.</li> </ul>                                                                                                                                                                                                                                                                                                                                                                                                                                                                                                                                                                                                                                                                                                                                                                                                                                                                                                                                                                                                                                                                                                                                                                     |
| <b>Antiplatelet Agents/Anticoagulants</b>            |                                                                                                                                                                                                                                                                                                                                                                                                                                                                                                                                                                                                                                                                                                                                                                                                                                                                                                                                                                                                                                                                                                                                                                                                                                                                                                                                                                                                                                                                                                                                                                        |
| <b>Interventions</b>                                 | <ul style="list-style-type: none"> <li>Start aspirin 75 to 162 mg/d and continue indefinitely in all patients unless contraindicated. <ul style="list-style-type: none"> <li>→ For patients undergoing coronary artery bypass grafting, aspirin should be started within 48 hours after surgery to reduce saphenous vein graft closure. Dosing regimens ranging from 100 to 325 mg/d appear to be efficacious. Doses higher than 162 mg/d can be continued for up to 1 year.</li> </ul> </li> <li>Start and continue clopidogrel 75 mg/d in combination with aspirin for up to 12 months in patients after acute coronary syndrome or percutaneous coronary intervention with stent placement (≥ 1 month for bare metal stent, ≥ 3 months for sirolimus-eluting stent, and ≥ 6 months for paclitaxel-eluting stent). <ul style="list-style-type: none"> <li>→ Patients who have undergone percutaneous coronary intervention with stent placement should initially receive higher-dose aspirin at 325 mg/d for 1 month for bare metal stent, 3 months for sirolimus-eluting stent, and 6 months for paclitaxel-eluting stent.</li> </ul> </li> <li>Manage warfarin to international normalized ratio=2.0 to 3.0 for paroxysmal or chronic atrial fibrillation or flutter, and in post-myocardial infarction patients when clinically indicated (eg, atrial fibrillation, left ventricular thrombus).</li> <li>Use of warfarin in conjunction with aspirin and/or clopidogrel is associated with increased risk of bleeding and should be monitored closely.</li> </ul> |
| <b>Renin-Angiotensin-Aldosterone System Blockers</b> |                                                                                                                                                                                                                                                                                                                                                                                                                                                                                                                                                                                                                                                                                                                                                                                                                                                                                                                                                                                                                                                                                                                                                                                                                                                                                                                                                                                                                                                                                                                                                                        |
| <b>Interventions</b>                                 | <p><b>Angiotensin converting enzyme (ACE) inhibitors:</b></p> <ul style="list-style-type: none"> <li>Start and continue indefinitely in all patients with left ventricular ejection fraction ≤ 40% and in those with hypertension, diabetes, or chronic kidney disease, unless contraindicated.</li> <li>Consider for all other patients.</li> <li>Among lower-risk patients with normal left ventricular ejection fraction in whom cardiovascular risk factors are well controlled and revascularization has been performed, use of ACE inhibitors may be considered optional.</li> </ul> <p><b>Angiotensin receptor blockers (ARB):</b></p> <ul style="list-style-type: none"> <li>Use in patients who are intolerant of ACE inhibitors and have heart failure or have had a myocardial infarction with left ventricular ejection fraction ≤ 40%.</li> <li>Consider in other patients who are ACE inhibitor intolerant.</li> <li>Consider use in combination with ACE inhibitors in systolic-dysfunction heart failure.</li> </ul> <p><b>Aldosterone blockade:</b></p> <ul style="list-style-type: none"> <li>Use in post-myocardial infarction patients, without significant renal dysfunction or hyperkalemia,</li> </ul>                                                                                                                                                                                                                                                                                                                                          |

|                              |                                                                                                                                                                                                                                                                                                                                                                                                         |
|------------------------------|---------------------------------------------------------------------------------------------------------------------------------------------------------------------------------------------------------------------------------------------------------------------------------------------------------------------------------------------------------------------------------------------------------|
|                              | who are already receiving therapeutic doses of an ACE inhibitor and f-blocker, have a left ventricular ejection fraction $\leq$ 40%, and have either diabetes or heart failure.                                                                                                                                                                                                                         |
| <b>Beta Blockers</b>         |                                                                                                                                                                                                                                                                                                                                                                                                         |
| <b>Interventions</b>         | <ul style="list-style-type: none"> <li>• Start and continue indefinitely in all patients who have had myocardial infarction, acute coronary syndrome, or left ventricular dysfunction with or without heart failure symptoms, unless contraindicated.</li> <li>• Consider chronic therapy for all other patients with coronary or other vascular disease or diabetes unless contraindicated.</li> </ul> |
| <b>Influenza Vaccination</b> |                                                                                                                                                                                                                                                                                                                                                                                                         |
| <b>Interventions</b>         | <ul style="list-style-type: none"> <li>• Patients with cardiovascular disease should have an influenza vaccination.</li> </ul>                                                                                                                                                                                                                                                                          |

## **AHA Guideline: Evidence-Based Guidelines for Cardiovascular Disease Prevention in Women: 2007 Update (Adapted from *Circulation*. 2007;115:1481-1501)**

These guidelines cover the primary and secondary prevention of chronic atherosclerotic vascular diseases in women  $\geq$  20 years of age.

### **Lifestyle Interventions**

#### **Cigarette Smoking**

- Women should not smoke and should avoid environmental tobacco smoke.
- Provide counseling, nicotine replacement, and other pharmacotherapy as indicated in conjunction with a behavioral program or formal smoking cessation program.

#### **Physical Activity**

- Women should accumulate a minimum of 30 minutes of moderate-intensity physical activity (eg, brisk walking) on most, and preferably all, days of the week.
- Women who need to lose weight or sustain weight loss should accumulate a minimum of 60 to 90 minutes of moderate-intensity physical activity (eg, brisk walking) on most, and preferably all, days of the week.

#### **Rehabilitation**

- A comprehensive risk-reduction regimen, such as cardiovascular or stroke rehabilitation or a physician-guided home- or community-based exercise training program, should be recommended to women with a recent acute coronary syndrome or coronary intervention, new-onset or chronic angina, recent cerebrovascular event, peripheral arterial disease, or current/prior symptoms of heart failure and an LVEF  $<$  40%

#### **Dietary Intake**

- Women should consume a diet rich in fruits and vegetables; choose whole-grain, high-fiber foods; consume fish, especially oily fish, at least twice a week; limit intake of saturated fat to  $<$  10% of energy, and if possible to  $<$  7%, cholesterol to  $<$  300 mg/d, alcohol intake to no more than 1 drink per day, and sodium intake to  $<$  2.3 g/d (approximately 1 tsp salt).
- Consumption of *trans*-fatty acids should be as low as possible (eg,  $<$ 1% of energy).

#### **Weight Maintenance/Reduction**

- Women should maintain or lose weight through an appropriate balance of physical activity, caloric intake, and formal behavioral programs when indicated to maintain/achieve a BMI between 18.5 and 24.9 kg/m<sup>2</sup> and a waist circumference  $\geq$  35 inches.

#### **Omega-3 Fatty Acids**

- As an adjunct to diet, omega-3 fatty acids in capsule form (approximately 850 to 1000 mg of EPA and DHA) may be considered in women with CHD, and higher doses (2 to 4 g) may be used for treatment of women with high triglyceride levels.

## Depression

- Consider screening women with CHD for depression and refer/treat when indicated.

## Major Risk Factor Interventions

### Blood Pressure—Optimal Level and Lifestyle

- Encourage an optimal blood pressure of < 120/80 mm Hg through lifestyle approaches such as weight control, increased physical activity, alcohol moderation, sodium restriction, and increased consumption of fresh fruits, vegetables, and low-fat dairy products.

### Blood Pressure—Pharmacotherapy

- Pharmacotherapy is indicated when blood pressure is  $\geq 140/90$  mm Hg or at an even lower blood pressure in the setting of chronic kidney disease or diabetes  $\geq 130/80$  mm Hg).
- Thiazide diuretics should be part of the drug regimen for most patients unless contraindicated or if there are compelling indications for other agents in specific vascular diseases.
- Initial treatment of high-risk women should be with  $\beta$ -blockers and/or ACE inhibitors/ARBs, with addition of other drugs such as thiazides as needed to achieve goal blood pressure.

### Lipid and Lipoprotein Levels—Optimal Levels and Lifestyle

- The following levels of lipids and lipoproteins in women should be encouraged through lifestyle approaches: LDL-C < 100 mg/dL, HDL-C > 50 mg/dL, triglycerides < 150 mg/dL, and non-HDL-C (total cholesterol minus HDL cholesterol) < 130 mg/dL.
- If a woman is at high risk or has hypercholesterolemia, intake of saturated fat should be < 7% and cholesterol intake < 200 mg/d).

### Lipids—Pharmacotherapy for LDL Lowering, High-risk Women

- Utilize LDL-C-lowering drug therapy simultaneously with lifestyle therapy in women with CHD to achieve an LDL-C < 100 mg/dL and similarly in women with other atherosclerotic CVD or diabetes mellitus or 10-year absolute risk > 20%.
- A reduction to < 70 mg/dL is reasonable in very-high-risk women with CHD and may require an LDL-lowering drug combination.

### Lipids—Pharmacotherapy for LDL Lowering, Other At-risk Women

- Utilize LDL-C-lowering therapy if LDL-C level is  $\geq 130$  mg/dL with lifestyle therapy and there are multiple risk factors and 10-year absolute risk 10% to 20%.
- Utilize LDL-C-lowering therapy if LDL-C level is  $\geq 160$  mg/dL with lifestyle therapy and multiple risk factors even if 10-year absolute risk is <10%.
- Utilize LDL-C-lowering therapy if LDL  $\geq 190$  mg/dL regardless of the presence or absence of other risk factors or CVD on lifestyle therapy.

### Lipid—Pharmacotherapy for Low HDL or Elevated Non-HDL, High-risk Women

- Utilize niacin or fibrate therapy when HDL-C is low or non-HDL-C is elevated in high-risk women after LDL-C goal is reached.

## **Lipid—Pharmacotherapy for Low HDL or Elevated Non-HDL, Other At-risk Women**

- Consider niacin or fibrate therapy when HDL-C is low or non-HDL-C is elevated after LDL-C goal is reached in women with multiple risk factors and a 10-year absolute risk 10% to 20%.

## **Diabetes Mellitus**

- Lifestyle and pharmacotherapy should be used as indicated in women with diabetes to achieve an HbA<sub>1c</sub> < 7% if this can be accomplished without significant hypoglycemia.

## **Preventive Drug Interventions**

### **Aspirin, High Risk**

- Aspirin therapy (75 to 325 mg/d)<sup>¶</sup> should be used in high-risk women unless contraindicated.
- If a high-risk woman is intolerant of aspirin therapy, clopidogrel should be substituted.

### **Aspirin—Other At-risk or Healthy Women**

- In women ≥ 65 years of age, consider aspirin therapy (81 mg daily or 100 mg every other day) if blood pressure is controlled and benefit for ischemic stroke and MI prevention is likely to outweigh risk of gastrointestinal bleeding and hemorrhagic stroke and in women < 65 years of age when benefit for ischemic stroke prevention is likely to outweigh adverse effects of therapy

### **β-Blockers**

- β-Blockers should be used indefinitely in all women after MI, acute coronary syndrome, or left ventricular dysfunction with or without heart failure symptoms, unless contraindicated.

### **ACE inhibitors/ARBs**

- ACE inhibitors should be used (unless contraindicated) in women after MI and in those with clinical evidence of heart failure or an LVEF ≤ 40% or with diabetes mellitus.
- In women after MI and in those with clinical evidence of heart failure or an LVEF ≤ 40% or with diabetes mellitus who are intolerant of ACE inhibitors, ARBs should be used instead.

### **Aldosterone Blockade**

- Use aldosterone blockade after MI in women who do not have significant renal dysfunction or hyperkalemia who are already receiving therapeutic doses of an ACE inhibitor and β-blocker, and have LVEF ≤ 40% with symptomatic heart failure.

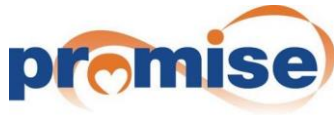

## **Physician Information Sheet**

### ***PROMISE Objective:***

To determine whether an initial non-invasive anatomic imaging strategy with cardiac CT angiography (CTA) will improve clinical outcomes in subjects with symptoms concerning for coronary artery disease (CAD) relative to an initial functional testing strategy.

### ***PROMISE Patient Population:***

Patients that present with symptoms concerning for obstructive CAD who require non-urgent noninvasive diagnostic testing.

### ***PROMISE Design:***

Multicenter, randomized pragmatic comparative effectiveness trial, with anticipated enrollment of 10,000 subjects from 200-250 primary care and cardiology community practice centers in North America.

### ***PROMISE Intervention:***

Subjects will be randomized to an initial testing strategy of either:

- Cardiac computed tomographic angiography or
- Functional stress testing with exercise ECG, exercise or pharmacologic stress Echocardiography, or exercise or pharmacologic stress SPECT imaging

### ***PROMISE End Points:***

Difference in the incidence of death, myocardial infarction, major peri-procedural complications and hospitalization for unstable angina between cardiac CTA and functional stress testing strategies.

## **Cardiac CTA**

### **Cardiac CTA is able to detect:**

- Presence of significant coronary stenosis
- Presence, extent and composition of coronary artery plaque
- Evidence of global and/or regional left ventricular (LV) functional impairment

### **Test Characteristics**

#### **Stenosis Detection:**

• CT accurately excludes significant stenosis (> 50%) with sensitivity of 95% and a NPV of 98% as compared to invasive coronary angiography • Specificity is limited to 85% and PPV is about 80% if image evaluation is diminished by the presence of coronary artery calcification or motion • CT is considered more accurate for the detection of stenosis morphology than functional testing

#### **Plaque Detection:**

• CT is sensitive (85%) to detect non-calcified plaque larger than 1 mm • Calcified plaque detection is very accurate  
• CT is the most reliable method available to detect non-obstructive CAD non-invasively **LV Function:**  
• CT accuracy is comparable to MR for global and regional function

### **Practical Tips**

• Patients with no coronary plaque on cardiac CTA have an extremely low risk for death over the next 5 years and typically do not require additional diagnostic evaluation unless there is a change in clinical status • CT may overestimate the degree of stenosis, and thus some patients with moderate stenosis may appear to have a more significant stenosis than is found on invasive angiography • Stress testing may be useful in determining the hemodynamic significance of stenoses identified on CT • More aggressive prevention strategies and risk assessment modification may be considered in patients with non-obstructive disease



## Stress Echocardiography

### Stress Echo is able to detect:

- Presence, extent and location of wall motion abnormality during rest and stress
- Global and regional left ventricular dysfunction
- High risk findings such as multivessel disease, systolic dilation
- Valve disease
- Other cardiac abnormalities associated with chest pain

### Test Characteristics

#### Stenosis Detection:

- Sensitivity of exercise echo is approximately 85% and the specificity is 88% and the sensitivity of dobutamine echo is 80% and the specificity is 84% as compared to invasive coronary angiography
- Stress echocardiography and nuclear perfusion imaging have similar diagnostic accuracy for the detection of coronary artery disease

#### Prognosis:

- A normal exercise echocardiogram is associated with an annual cardiovascular event rate of <1% and these patients typically do not require additional diagnostic evaluation unless there is a change in clinical status
- Patients with extensive stress induced wall motion abnormalities in a multivessel pattern are at high risk for cardiac event including mortality

### Practical Tips

- False negative stress echocardiograms are most common in those who fail to achieve an adequate stress and those with single vessel disease particularly in the left circumflex coronary artery territory
- False positive stress echocardiograms can occur in any setting with mismatch of myocardial oxygen demand and myocardial perfusion (oxygen supply – i.e.: hypertension and cardiomyopathy)
- Conduction abnormalities may also cause false positive interpretations due to abnormal wall motion.
- Baseline LV dysfunction, failure to augment LV ejection fraction with stress, wall motion abnormality at a low workload and wall motion abnormalities in the anterior territory (or left anterior coronary artery distribution) are other high risk findings
- The prognostic value of stress echocardiography in women is similar to that of men

## Exercise Treadmill Test

### Stress ECG is able to detect:

- Normal rest ECG
- ST changes consistent with ischemia
- High risk findings such as very poor exercise tolerance, severe ventricular arrhythmia/hypotension

### Test Characteristics

#### Stenosis Detection:

- Sensitivity of 67% and a specificity of 72% for the detection of significant stenosis in patients with an intermediate pretest likelihood of CAD as compared to invasive coronary angiography

#### Prognosis:

- “Early positive” exercise test result (inability to complete 1st two stages of Bruce protocol, exercise induced angina and treadmill time) have been identified as independent predictors of survival
- The Duke Treadmill score can identify a high risk group (score less than or equal to -11) with an average annual cardiovascular mortality greater than or equal to 5%.

### Practical Tips

- ETT accuracy is slightly worse in women compared to men
- Patients with LVH by ECG criteria and ST depression have a lower specificity 70% ( vs 84%) with no change in sensitivity
- Exercise-induced ST depression usually occurs with right bundle-branch block in the anterior chest leads (V1 through V3) and is not associated with ischemia. Lateral leads (V4 through V6 ) and inferior leads (II and aVF) can be used to identify ischemia
- Computer processing of the exercise ECG can result in a false-positive indication of ST depression

## Stress Nuclear

### SPECT/PET is able to detect:

- Presence, extent and location of reversible or irreversible myocardial ischemia/scar
- High-risk findings such as transient ischemic dilatation
- Global and regional left ventricular dysfunction

### Test Characteristics

#### Stenosis Detection:

- Reversible ischemia on exercise/pharmacologic SPECT or PET has been found to have sensitivities of 87% and 90%, respectively, and in contemporary protocols (Tc agents and incorporation of gated images, or PET perfusion) specificities are 85-90% for the detection of significant stenosis as compared to invasive coronary angiography

#### Prognosis: Annual risks for MI/death based on stress SPECT and PET findings are:

- o normal: 0.3/0.5%; 0.2/0.5%
- o mildly abnormal: 0.8/2.7%; 1.3/1.4%
- o moderately abnormal: 2.3/2.9%; 3.6/3.0%
- o severely abnormal stress: 2.9/4.2%; 6.4/5.8%

### Practical Tips

- Ideally, medications should be held if possible so as to give best chance of reaching maximum stress
- Pharmacologic stress can be used if patients do not reach an adequate symptomatic or heart rate end point

## PROMISE Diagnostic Core

ECG Core Laboratory, Duke University Medical Center, 508 Fulton Street, Room A3012, Durham, NC 27705

Echocardiography Core Lab, Massachusetts General Hospital, Yawkey 5E, 55 Fruit St, Boston, MA 02114

Cardiac Radionuclide Imaging Core Laboratory, Tufts Medical Center, 800 Washington St., Proger 303, Boston, MA 02111

Cardiovascular Imaging Core, Massachusetts General Hospital, 25 New Chardon St, Suite 400B, Boston, MA 02114

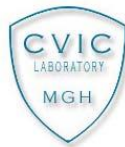

Supplement: NIHMS696948-supplement-Supplement1.pdf [file NIHMS696948-supplement-Supplement1.pdf]
